# THE JOURNAL OF NEUROPSYCHIATRY and Clinical Neurosciences

The Official Journal of the American Neuropsychiatric Association

## In this issue:

- The Neuroendocrine Effects of Traumatic Brain Injury
- Neurocognitive Impairment and Dementia in Mood Disorders
- Frontal White Matter Integrity in Borderline Personality Disorder With Self-Injurious Behavior
- Methodological Issues in Conducting Treatment Trials for Psychological Nonepileptic Seizures
- Risk Factors for and Correlates of Poststroke Depression Following Discontinuation of Antidepressants

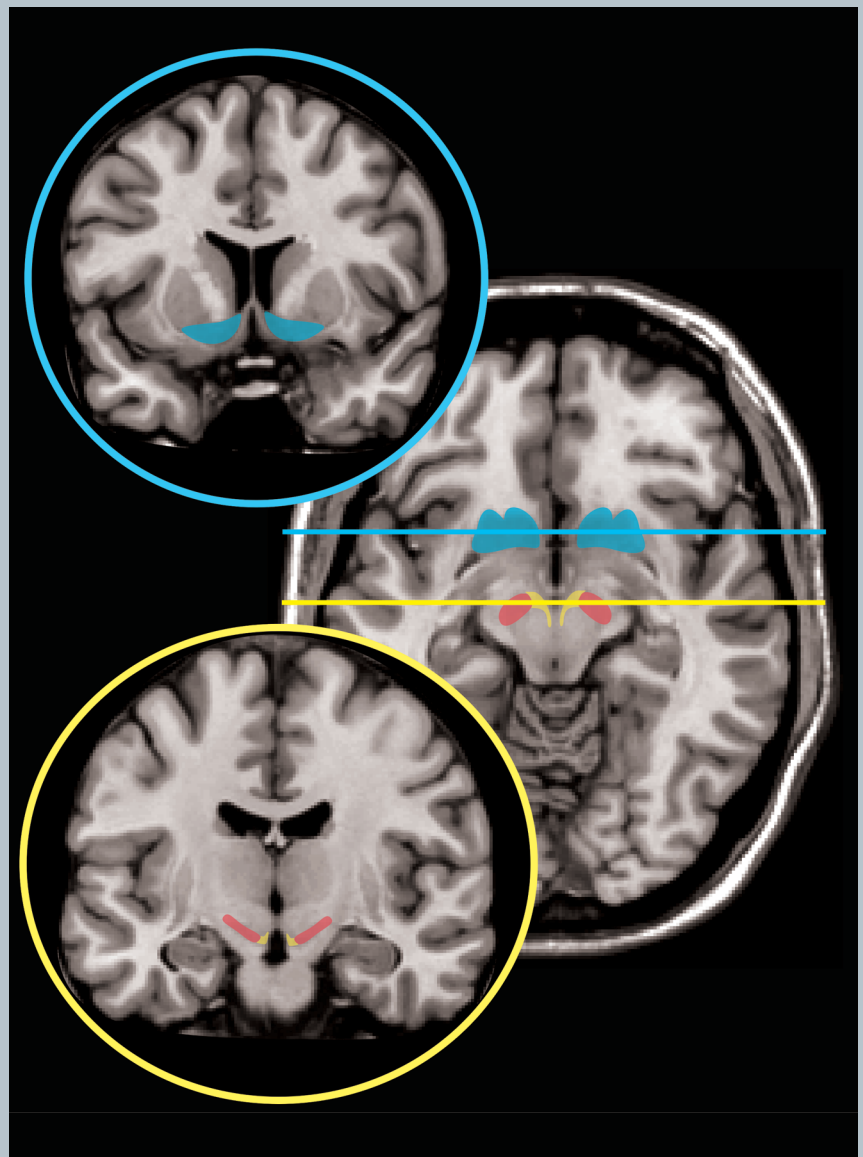

Source: https://psychiatryonline.org/doi/suppl/10.1176/jnp.2007.19.issue-4/suppl_file/cover.pdf
